# Supplementary material for: Sorghum DW1 positively regulates brassinosteroid signaling by inhibiting the nuclear localization of BRASSINOSTEROID INSENSITIVE 2
Source: PubMed Central journal article supplement (PMC5428356; doi:10.1038/s41598-017-00096-w), 2017-03-09
Supplement: 41598_2017_96_MOESM1_ESM.pdf [file 41598_2017_96_MOESM1_ESM.pdf]

## **Supplemental Data**

Title: Sorghum DW1 positively regulates BR signaling by inhibiting the nuclear localization of BIN2

Authors: Ko Hirano, Mayuko Kawamura, Satoko Araki-Nakamura, Haruka Fujimoto, Kozue Ohmae-Shinohara, Miki Yamaguchi, Akihiro Fujii, Hiroaki Sasaki, Shigemitsu Kasuga, Takashi Sazuka

Supplementary figures: S1 to S8

Supplementary tables: S1 to S2

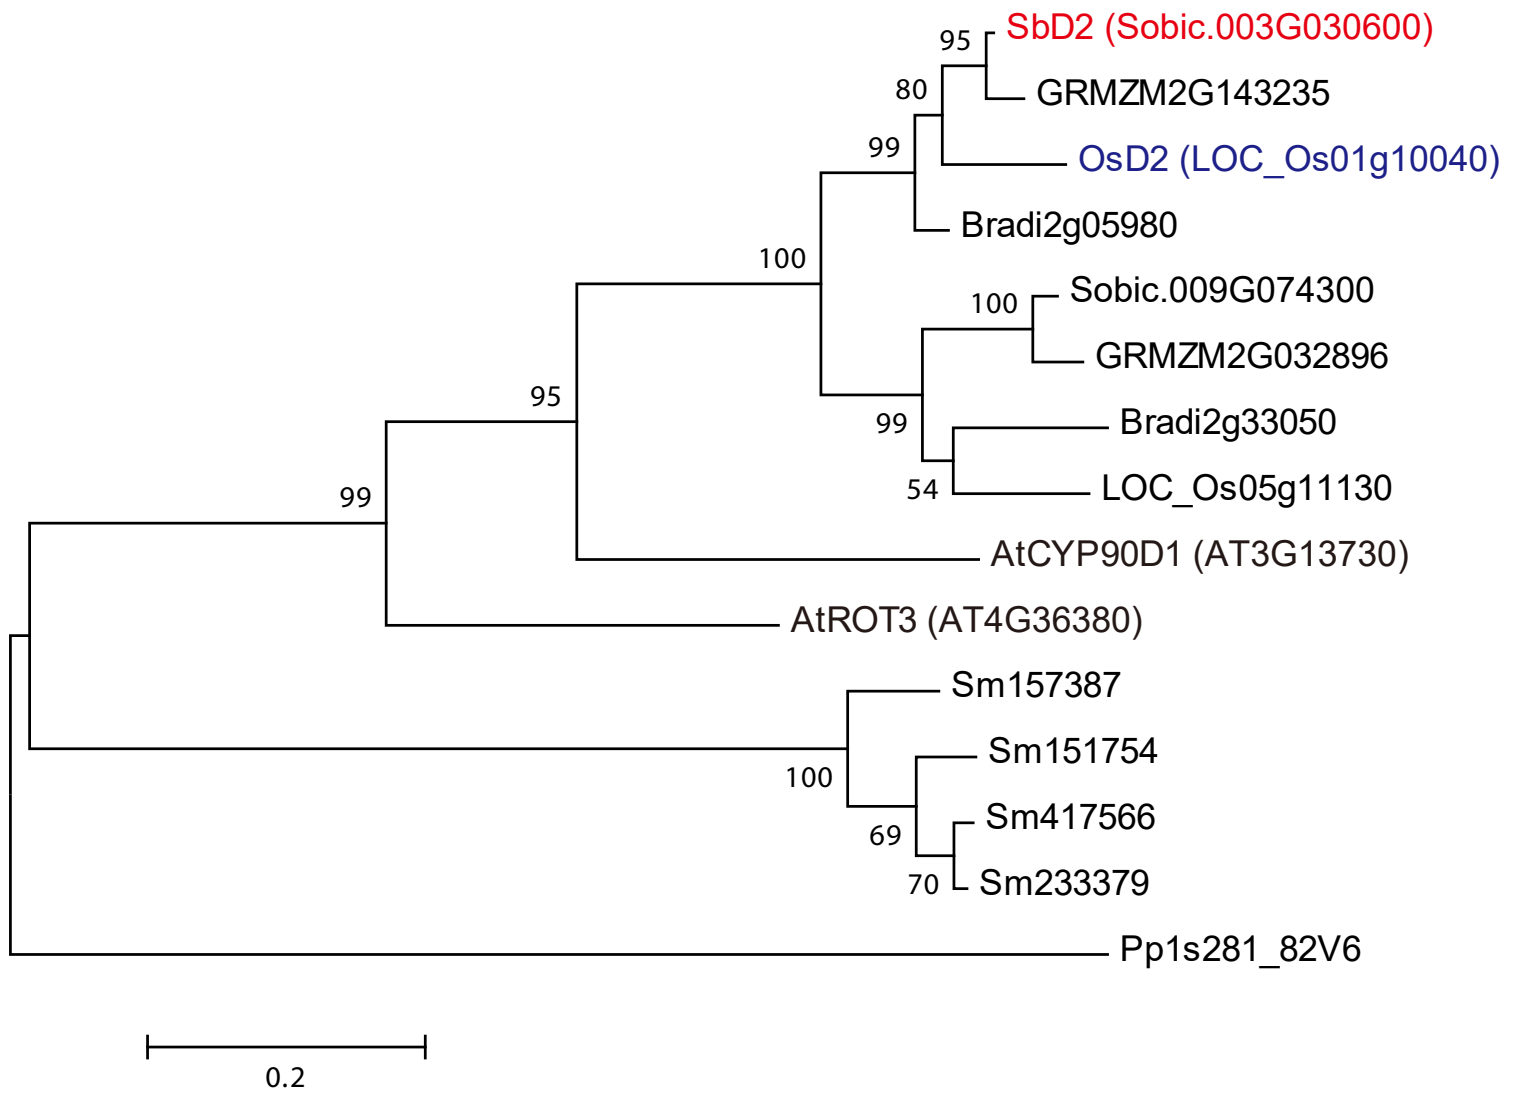

Fig. S1. Phylogenetic analysis of D2 homologs using the NJ method. SbD2 (Sobic.003G030600) and OsD2 (LOC\_Os01g10040) are shown in red and blue, respectively. Bootstrap values were obtained by 100 bootstrap replicates.

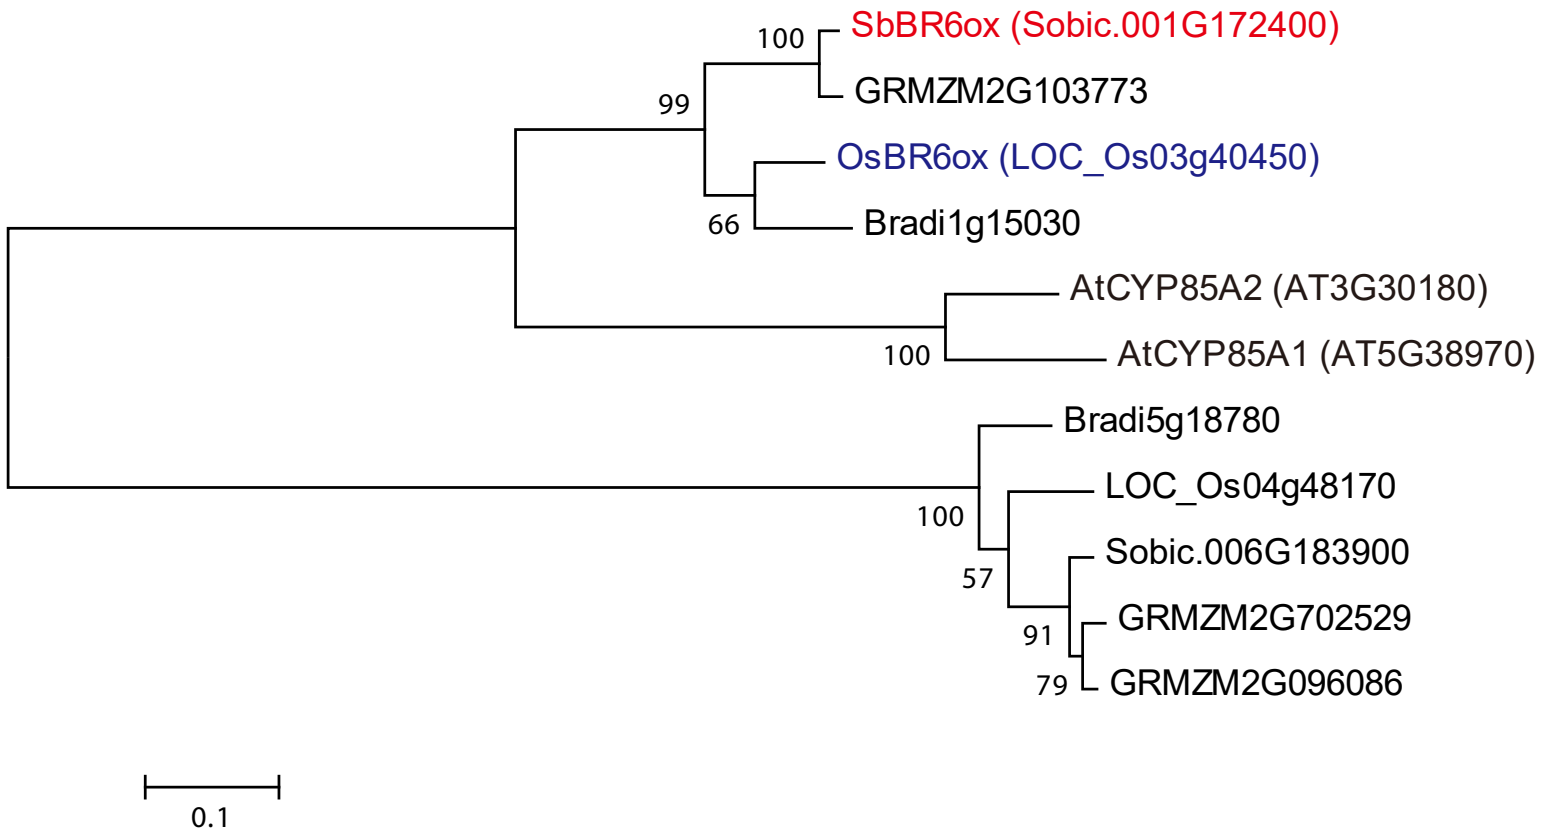

Fig. S2. Phylogenetic analysis of BR6ox homologs using the NJ method. SbBR6ox (Sobic.001G172400) and OsBR6ox (LOC\_Os03g40540) are shown in red and blue, respectively.

Bootstrap values were obtained by 100 bootstrap replicates.

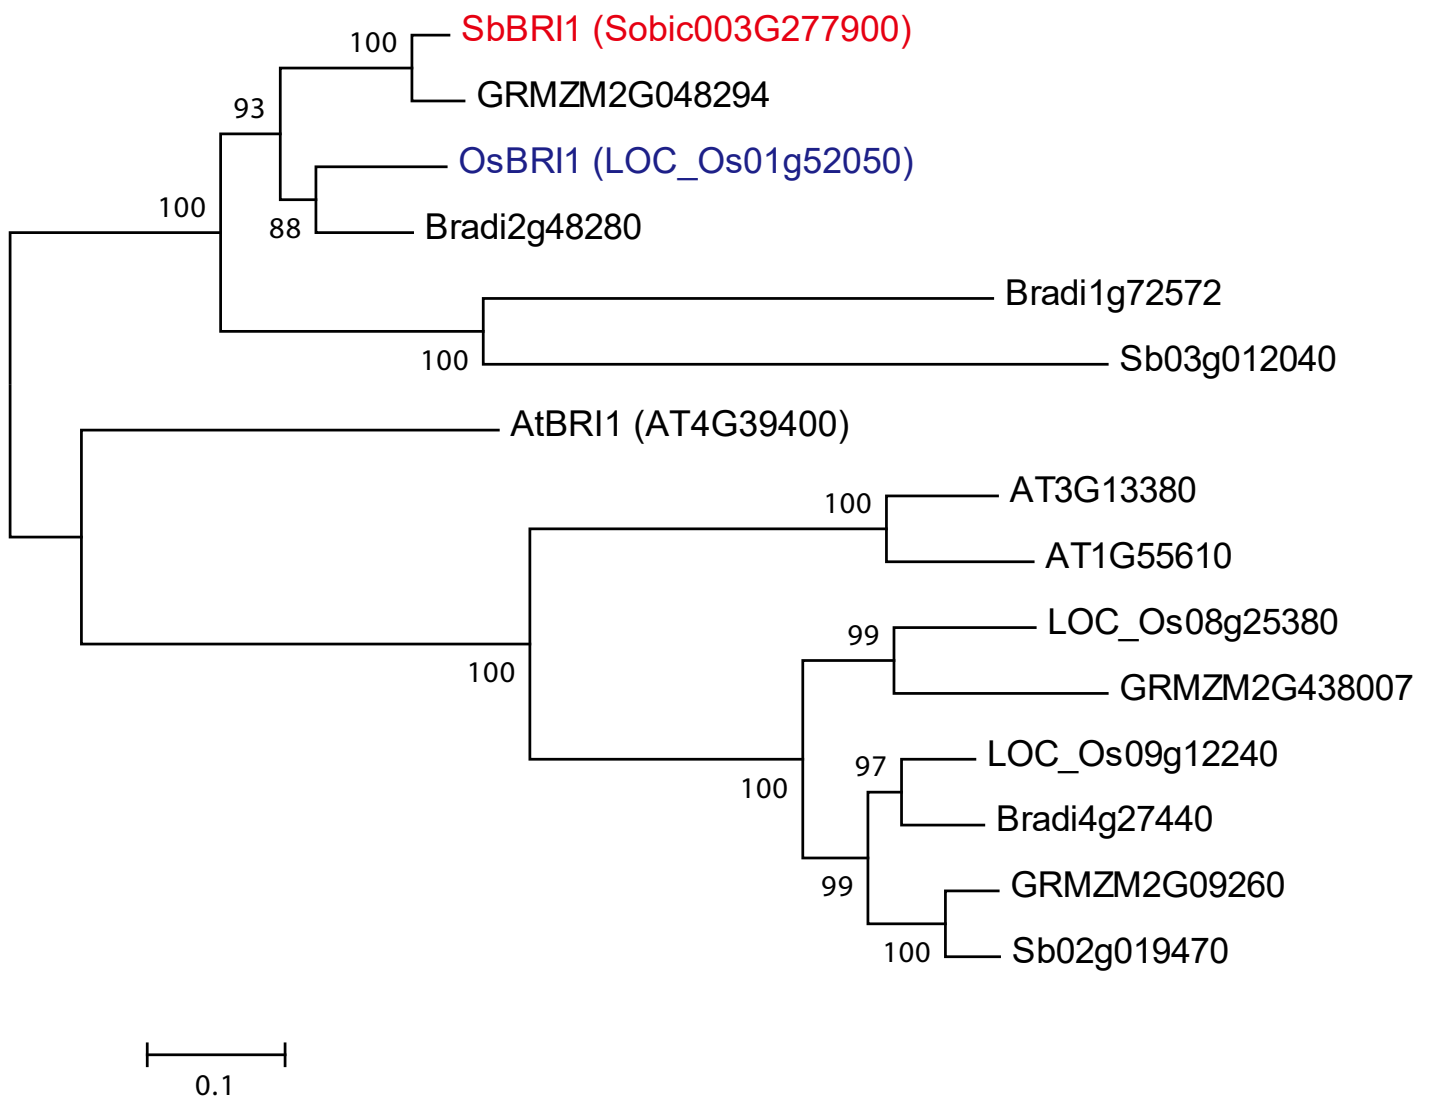

Fig. S3. Phylogenetic analysis of BRI1 homologs using the NJ method. SbBRI1 (Sobic.003G277900) and OsBRI1 (LOC\_Os01g52050) are shown in red and blue, respectively. Bootstrap values were obtained by 100 bootstrap replicates.

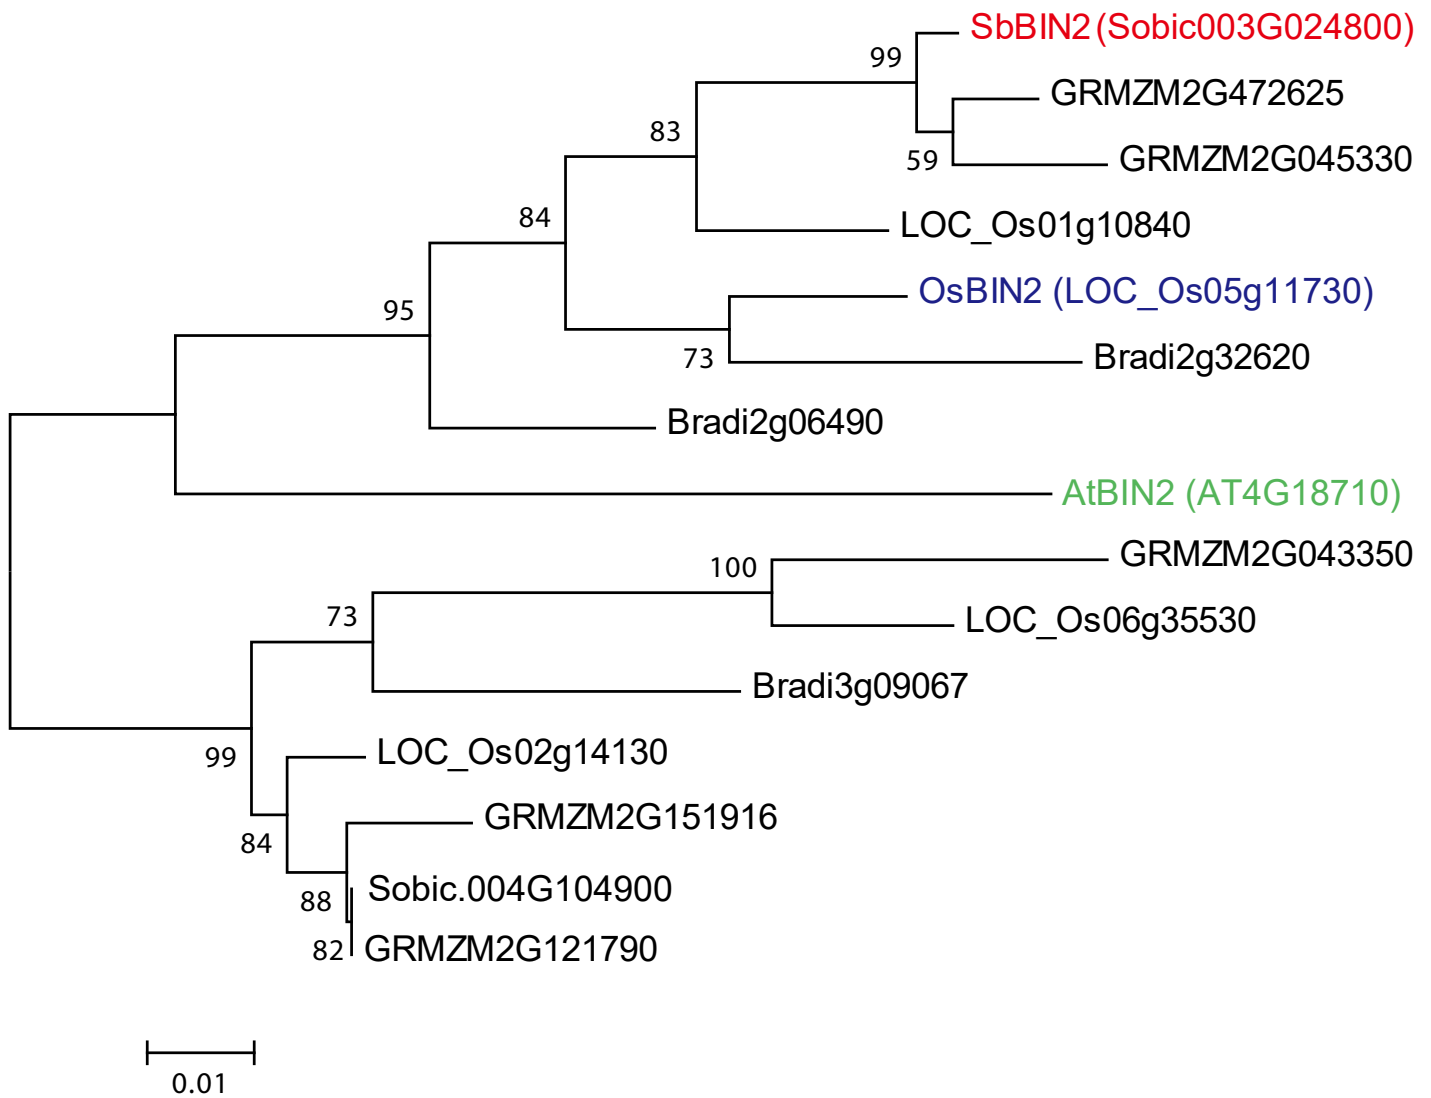

Fig. S4. Phylogenetic analysis of BIN2 homologs using the NJ method. SbBIN2 (Sobic.003G24800), OsBIN2 (LOC\_Os05g11730), and AtBIN2 (AT4G18710) are shown in red, blue, and green, respectively. Bootstrap values were obtained by 100 bootstrap replicates.

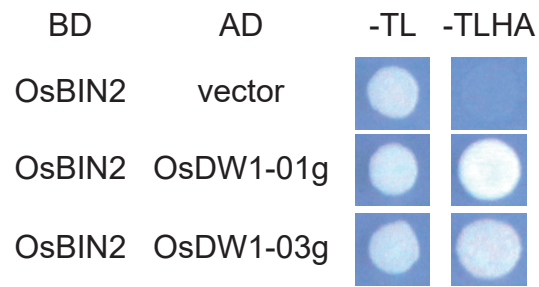

Fig. S5. Interaction of OsDW1-OsBIN2 in a Y2H assay. The growth of yeast strain AH109 transformants is shown. BIN2s were used as bait, and DW1s were used as prey. -TL, synthetic complete medium lacking Trp and Leu; -TLHA, synthetic complete medium lacking Trp, Leu, His, and Ade. OsDW1-01g and OsDW1-03g refer to LOC\_Os01g01390 and LOC\_Os03g16400, respectively.

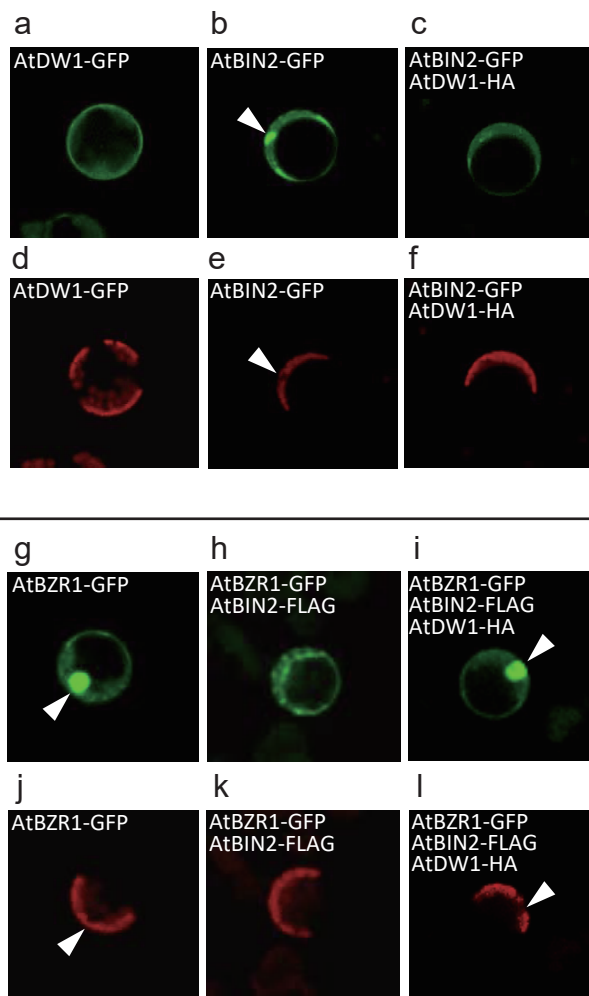

Fig. S6. Transient expression of AtDW1, AtBIN2, and AtBZR1 in *Arabidopsis* protoplasts. (a) AtDW1 localizes on the plasma membrane and in the cytosol. (b) AtBIN2 localizes to the nucleus and the cytosol. (c) Simultaneous expression of AtDW1 and AtBIN2 inhibits nuclear localization of AtBIN2. (g) AtBZR1 localizes to the nucleus and the cytosol. (h) Simultaneous expression of AtBZR1 and AtBIN2 inhibits nuclear localization of AtBZR1. (i) AtDW1, AtBIN2, and AtBZR1 co-expression results in AtBZR1 localizing to the nucleus. *Arabidopsis* protoplasts were transformed with either AtBIN2-GFP, AtBZR1-GFP, AtDW1-GFP, and co-transformed with AtBIN2-FLAG, AtDW1-HA, or AtBIN2-FLAG/AtDW1-HA. (d-f, j-l) Chloroplast autofluorescence of *Arabidopsis* protoplasts are shown as the red channel.

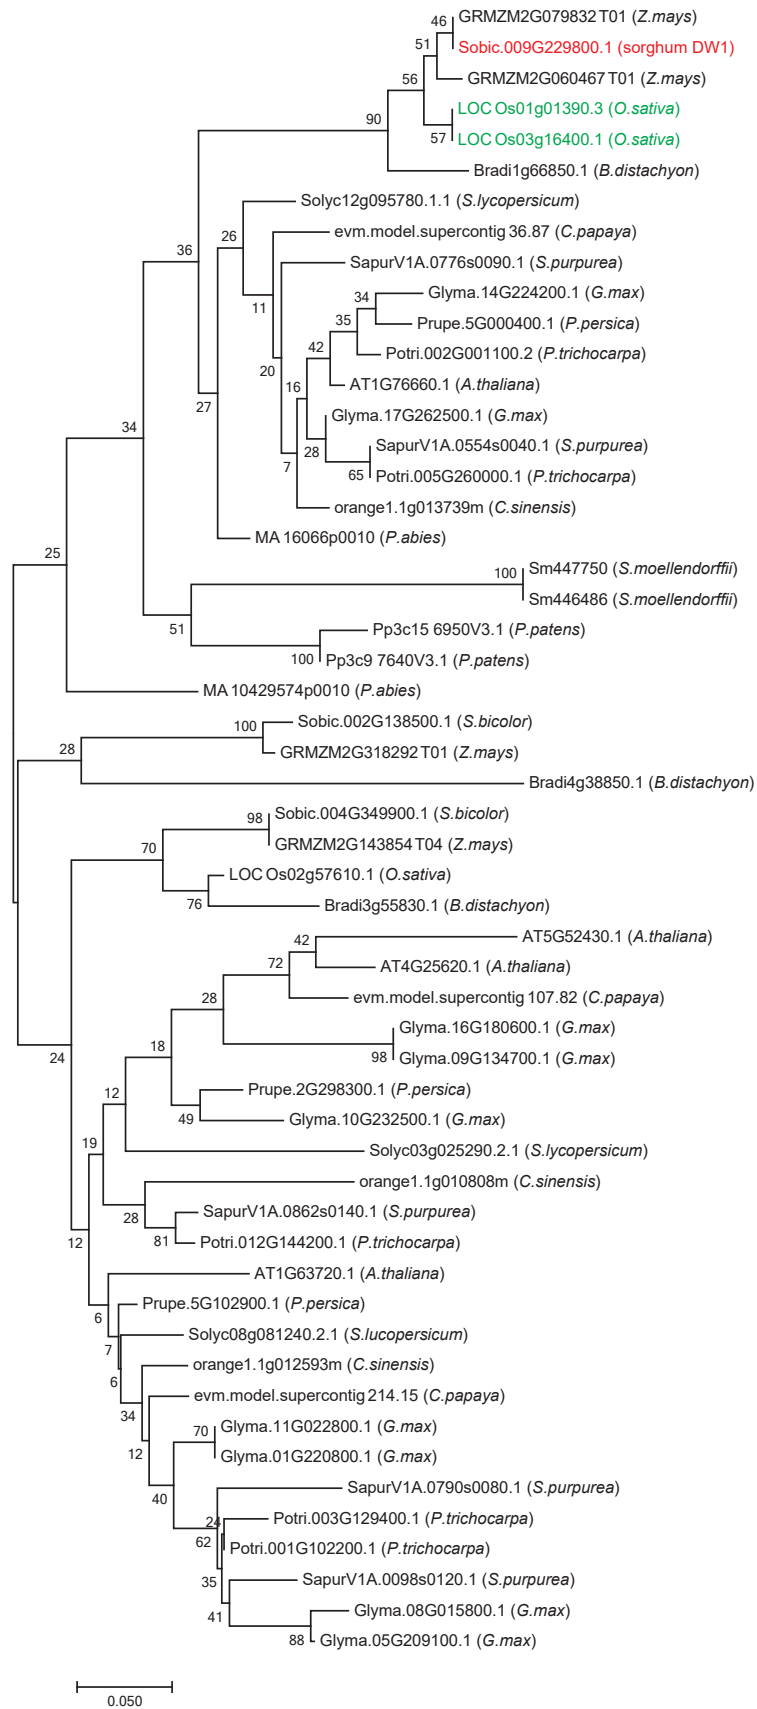

Fig. S7. Phylogenetic analysis of DW1 homologs using the neighbor-joining method. Bootstrap values were obtained by 100 bootstrap replicates.



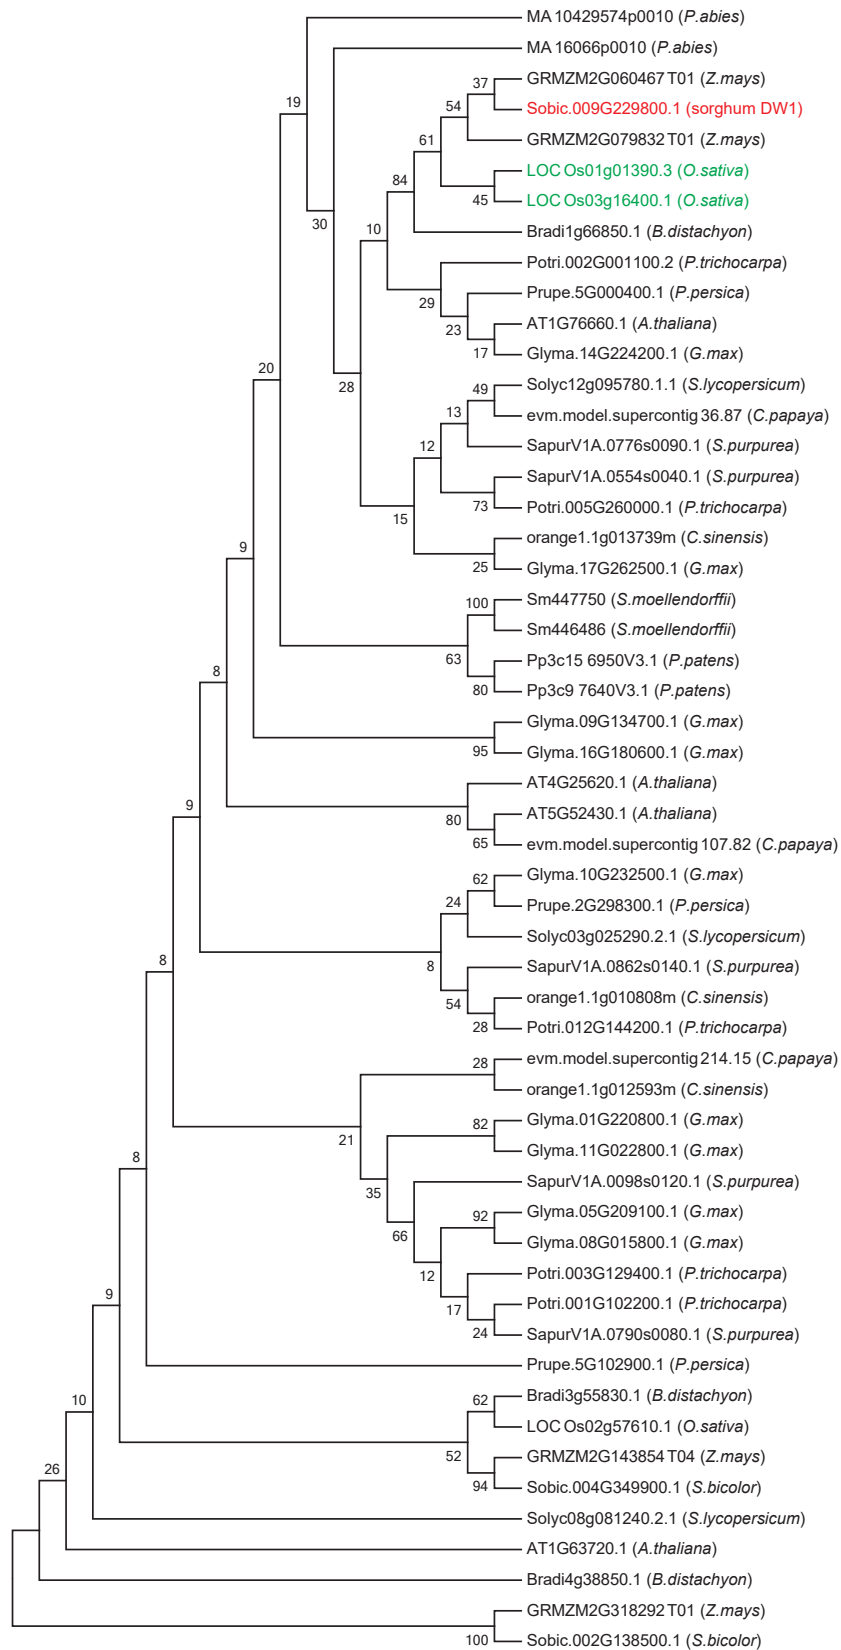

Fig. S8. Phylogenetic analysis of DW1 homologs using the maximum parsimony method. Bootstrap values were obtained by 100 bootstrap replicates.

**Supplemental Table 1.** Dw1 homologs used to create phylogenetic trees.

| plant species          | gene name                    | e-value <sup>a</sup> |
|------------------------|------------------------------|----------------------|
| <b>grass</b>           |                              |                      |
| <i>S. bicolor</i>      | Sobic009G229800.1            | 0                    |
|                        | Sobic004G349900.1            | 7.30E-23             |
|                        | Sobic002G138500.1            | 8.10E-09             |
| <i>O. sativa</i>       | LOC_Os03g16400.1             | 4.50E-175            |
|                        | LOC_Os01g01390.3             | 7.60E-171            |
|                        | LOC_Os02g57610.1             | 1.80E-20             |
| <i>B. distachyon</i>   | Bradi1g66850.1               | 0                    |
|                        | Bradi3g55830.1               | 2.90E-21             |
|                        | Bradi4g38850.1               | 5.40E-07             |
| <i>Z. mays</i>         | GRMZM2G079832_T01            | 0                    |
|                        | GRMZM2G060467_T01            | 0                    |
|                        | GRMZM2G143854_T04            | 3.90E-22             |
|                        | GRMZM2G318292_T01            | 5.60E-10             |
| <b>dicotyledonous</b>  |                              |                      |
| <i>A. thaliana</i>     | AT1G76660.1                  | 2.20E-60             |
|                        | AT1G63720.1                  | 4.80E-31             |
|                        | AT5G52430.1                  | 1.60E-16             |
|                        | AT4G25620.1                  | 5.80E-07             |
| <i>G. max</i>          | Glyma.17G262500.1            | 3.60E-75             |
|                        | Glyma.14G224200.1            | 2.70E-73             |
|                        | Glyma.01G220800.1            | 1.80E-19             |
|                        | Glyma.11G022800.1            | 5.80E-19             |
|                        | Glyma.09G134700.1            | 8.20E-18             |
|                        | Glyma.16G180600.1            | 3.00E-17             |
|                        | Glyma.05G209100.1            | 5.20E-17             |
|                        | Glyma.10G232500.1            | 1.10E-15             |
|                        | Glyma.08G015800.1            | 8.80E-11             |
| <i>S. lycopersicum</i> | Solyc12g095780.1.1           | 7.00E-56             |
|                        | Solyc08g081240.2.1           | 1.80E-24             |
|                        | Solyc03g025290.2.1           | 6.00E-20             |
| <i>P. persica</i>      | Prupe.5G000400.1             | 1.40E-70             |
|                        | Prupe.5G102900.1             | 1.20E-67             |
|                        | Prupe.2G298300.1             | 4.30E-20             |
| <i>C. sinensis</i>     | orange1.1g013739m            | 1.90E-74             |
|                        | orange1.1g010808m            | 1.40E-22             |
|                        | orange1.1g012593m            | 3.80E-20             |
| <i>C. papaya</i>       | evm.model.supercontig_36.87  | 1.10E-44             |
|                        | evm.model.supercontig_214.15 | 1.30E-23             |
|                        | evm.model.supercontig_107.82 | 3.10E-20             |
| <i>S. purpurea</i>     | SapurV1A.0776s0090.1         | 8.40E-73             |
|                        | SapurV1A.0554s0040.1         | 1.50E-67             |
|                        | SapurV1A.0862s0140.1         | 4.80E-20             |
|                        | SapurV1A.0098s0120.1         | 1.60E-17             |
|                        | SapurV1A.0790s0080.1         | 1.20E-15             |
| <i>P. trichocarpa</i>  | Potri.002G001100.2           | 1.40E-72             |
|                        | Potri.005G260000.1           | 4.40E-69             |
|                        | Potri.012G144200.1           | 1.70E-20             |
|                        | Potri.001G102200.1           | 7.80E-18             |
|                        | Potri.003G129400.1           | 1.10E-16             |
| <b>gymnosperm</b>      |                              |                      |
| <i>P. abies</i>        | MA_16066p0010                | 1.19E-53             |
|                        | MA_10429574p0010             | 1.65E-23             |

**lycophyte**

|                          |          |          |
|--------------------------|----------|----------|
| <i>S. moellendorffii</i> | Sm446486 | 5.40E-24 |
|                          | Sm447750 | 1.20E-23 |

**bryophyte**

|                  |                 |          |
|------------------|-----------------|----------|
| <i>P. patens</i> | Pp3c9_7640V3.1  | 3.40E-19 |
|                  | Pp3c15_6950V3.1 | 1.40E-18 |

<sup>a</sup>. tblastn was conducted using Sobic009G229800.1 (SbDW1) as query.

**Supplemental Table 2.** Details of primers used in this study

| Primer name      | Sequence (5' to 3')                   | Purpose                      |
|------------------|---------------------------------------|------------------------------|
| SbD2_RT_F        | CTACGATGAGCCCTACAGTTTC                | RT-PCR (Os01g0103800)        |
| SbD2_RT_R        | ACCAAGTGATGGAGAAAGATGG                |                              |
| SbBR6ox_RT_F     | TTATAGCGAGGATATAGGTATCATAGG           | RT-PCR (Os03g0270700)        |
| SbBR6ox_RT_R     | TTCTGTTTAAATTTGAAAATTGATGG            |                              |
| SbBR11_RT_F      | CTGCCAGGGGTTAGTAGTG                   | RT-PCR                       |
| SbBR11_RT_R      | TGTACCATCAGAAGGGAATGC                 |                              |
| SbDW1_RT_F       | TGCATTGAATTCGAGCTGTC                  | RT-PCR (SbDW1 BL treatment)  |
| SbDW1_RT_R       | ATTTCACTGCTCCTGCGAAC                  |                              |
| SbDW1_RT_F       | GTCTTCAGTTGGGAGCAGCCCTGGCACCAG        | RT-PCR (organ expression)    |
| SbDW1_RT_R       | ATTGGCACCAGATTGACCATTTCCACGAGC        |                              |
| SbUbiquitin_RT_F | TGCAGTGGAGCTCTTCTC                    | RT-PCR (sorghum ubiquitin)   |
| SbUbiquitin_RT_R | CGTTAAGCCAAACACTCCTG                  |                              |
| SbDW1_AD_F       | GCGGATCCATATGTCTTCAGTTGGG             | Y2H                          |
| SbDW1_AD_R       | GGCTCGAGTTAATGCAATTGTCTTGC            |                              |
| SbBIN2_BD_F      | GCGAATTCATGGAGGCGCCGCGGGAC            | Y2H                          |
| SbBIN2_BD_R      | GCGTCGACCTAGCTCCCAACATGCCC            |                              |
| OsDW1-01g_AD_F   | GCGGATCCATATGGCGGCTACACCAG            | Y2H (Os01g0103800)           |
| OsDW1-01g_AD_R   | GGCTCGAGTTACTGTAGTTGCCTTGC            |                              |
| OsDW1-03g_AD_F   | GCGGATCCATATGTTTCGCTGTTGGGC           | Y2H (Os03g0270700)           |
| OsDW1-03g_AD_R   | GGCTCGAGTTACTGTAGTTGCCTTGC            |                              |
| OsBIN2_BD_F      | GCGAATTCATGGACCAGCCGCGCCG             | Y2H                          |
| OsBIN2_BD_R      | GCGTCGACTTAGCTCCAGTATTGAAG            |                              |
| AtDW1_AD_F       | GCGAATTCATGGGCTCAGAGCAGGATC           | Y2H                          |
| AtDW1_AD_R       | GGCCCGGGTCAGGCTTTTCTGTGTCTGTTC        |                              |
| AtBIN2_BD_F      | GCGAATTCATGGGCTCAGAGCAGGATC           | Y2H                          |
| AtBIN2_BD_R      | GGCCCGGGTCAGGCTTTTCTGTGTCTGTTC        |                              |
| SbDW1-GFP_F      | CACCATGTCTTCAGTTGGGAGCAGCC            | transient assay construction |
| SbDW1-GFP_R      | ATGCAATTGTCTTGCCAATGCACTCC            |                              |
| SbBIN2-GFP_F     | TACAACCTACATCTAGATGGAGGCGCCGCGGGACC   | transient assay construction |
| SbBIN2-GFP_R     | TGCTCACCATACTAGTGTCTCCCAACATGCCCGAAGT |                              |
| SbBZR1-GFP_F     | TACAACCTACATCTAGAATGACGTCGGGGGCGGCC   | transient assay construction |
| SbBZR1-GFP_R     | TGCTCACCATACTAGTCTTTGGCGCCGACGCCAAG   |                              |
| SbBIN2-FLAG_F    | CACCATGGAGGCGCCGCGGGACCGG             | transient assay construction |
| SbBIN2-FLAG_R    | GCTCCCAACATGCCCGAAGTTGACAC            |                              |
| SbDW1-HA_F       | GGCCAGTGCCAAGCTTTGCAGCGTGACCCGGTTCG   | transient assay construction |
| SbDW1-HA_R       | CGTATGGGTAAGTATGCAATTGTCTTGCCAATG     |                              |
| AtBIN2-GFP_F     | TACAACCTACATCTAGATGGCTGATGATAAGGAGAT  | transient assay construction |
| AtBIN2-GFP_R     | TGCTCACCATACTAGTAGTTCCAGATTGATTCAAGA  |                              |
| AtBZR1-GFP_F     | TACAACCTACATCTAGAATGACTTCGGATGGAGCT   | transient assay construction |
| AtBZR1-GFP_R     | TGCTCACCATACTAGTACCACGAGCCTTCCATT     |                              |
| AtBIN2-FLAG_F    | TACAACCTACATCTAGAATGGCTGATGATAAGGAGAT | transient assay construction |
| AtBIN2-FLAG_R    | CTTTGTAGTCACTAGTAGTTCCAGATTGATTCAAGAA |                              |
| AtDW1-HA_F       | CGACTCTAGAGGATCCATGGGCTCAGAGCAGGAT    | transient assay construction |
| AtDW1-HA_R       | CGTATGGGTAAGTATGGCTTTTCTGTGTCTGTTC    |                              |
| AtDW1-GFP_F      | TACAACCTACATCTAGAATGGGCTCAGAGCAGGAT   | transient assay construction |
| AtDW1-GFP_R      | TGCTCACCATACTAGTGGCTTTTCTGTGTCTGTTC   |                              |
